# Supplementary material for: Longitudinal 16S rRNA gut microbiota data of infant triplets show partial susceptibility to host genetics
Source: PubMed Central journal article supplement — iScience. 2022 Feb 2;25(3):103861. doi: 10.1016/j.isci.2022.103861 (PMC8850664; doi:10.1016/j.isci.2022.103861), 2022-02-02
Supplement: mmc1.pdf [file mmc1.pdf]

**iScience, Volume 25**

**Supplemental information**

**Longitudinal 16S rRNA gut microbiota**

**data of infant triplets show partial**

**susceptibility to host genetics**

**Ondina Palmeira, Larissa R.B. Matos, Michel S. Naslavsky, Heloisa M.S. Bueno, Júlia P. Soler, João C. Setubal, and Mayana Zatz**

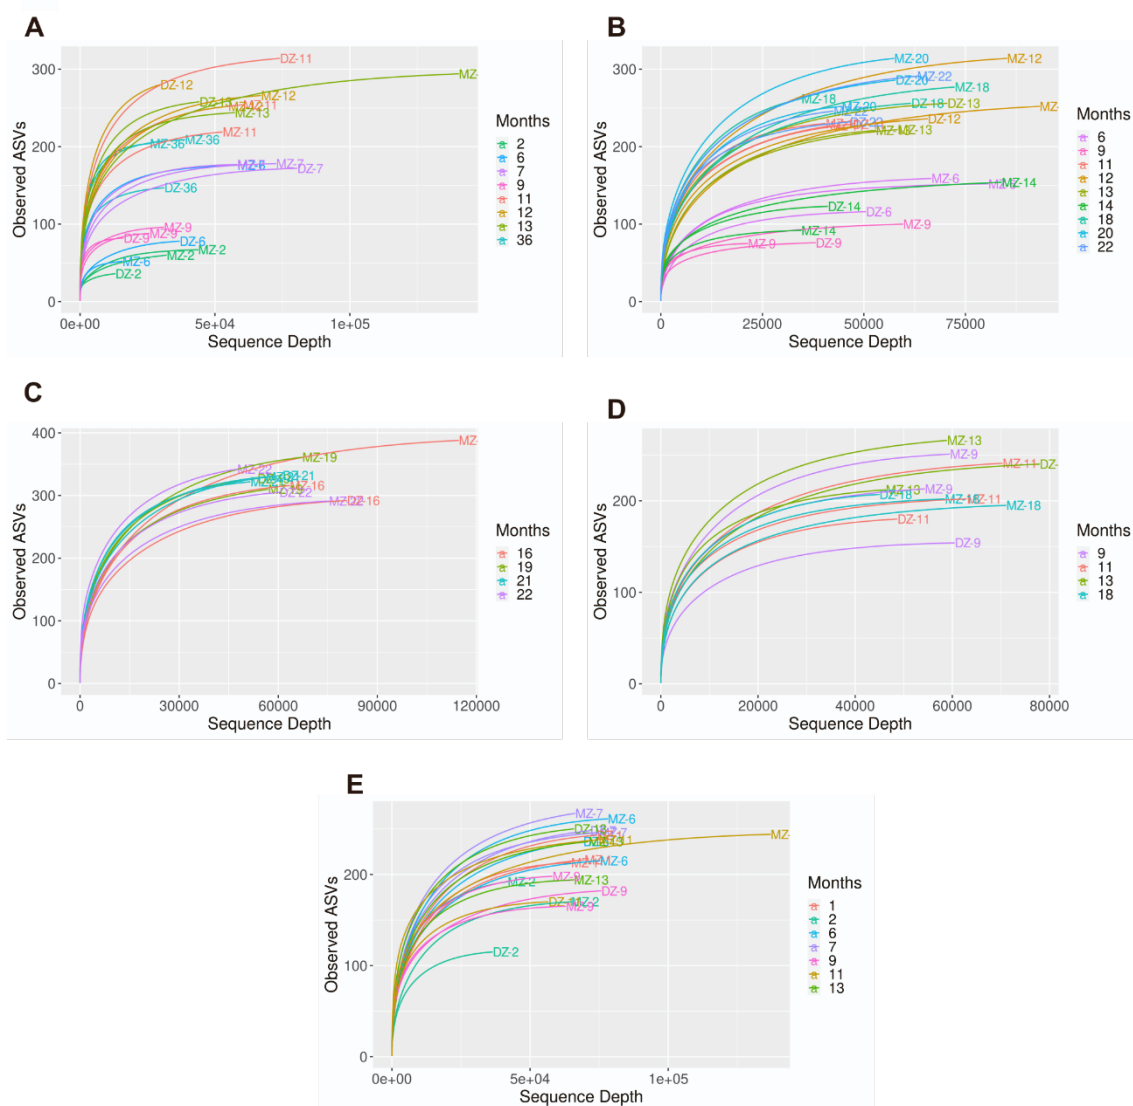

**Figure S1. Rarefaction curves. (A) set A, (B) set B, (C) set C, (D) set D, (E), set E.** Samples reached a plateau indicating sufficient sequence depth. Each curve is a sample that is color-coded by time point at the far right of each graph. MZ1 = monozygotic twin 1, MZ2 = monozygotic twin 2, DZ = dizygotic twin; numbers are the time points in months. Related to STAR Methods.

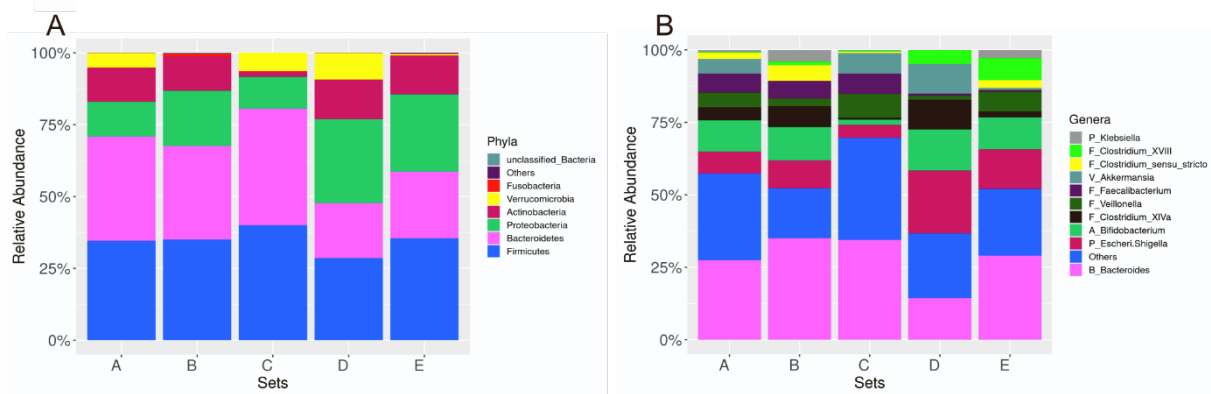

**Figure S2. Firmicutes and Bacteroidetes presented the highest relative abundance in almost all sets.** Relative abundance of Phyla (A) and Genera (B) per set. (A) Only the six most relatively abundant Phyla and unclassified bacteria are shown. The other remaining phyla are grouped in "Others". (B) Only the 10 most relatively abundant genera are shown. The other remaining genera are grouped in "Others". Related to Figure 1 and Table S3.

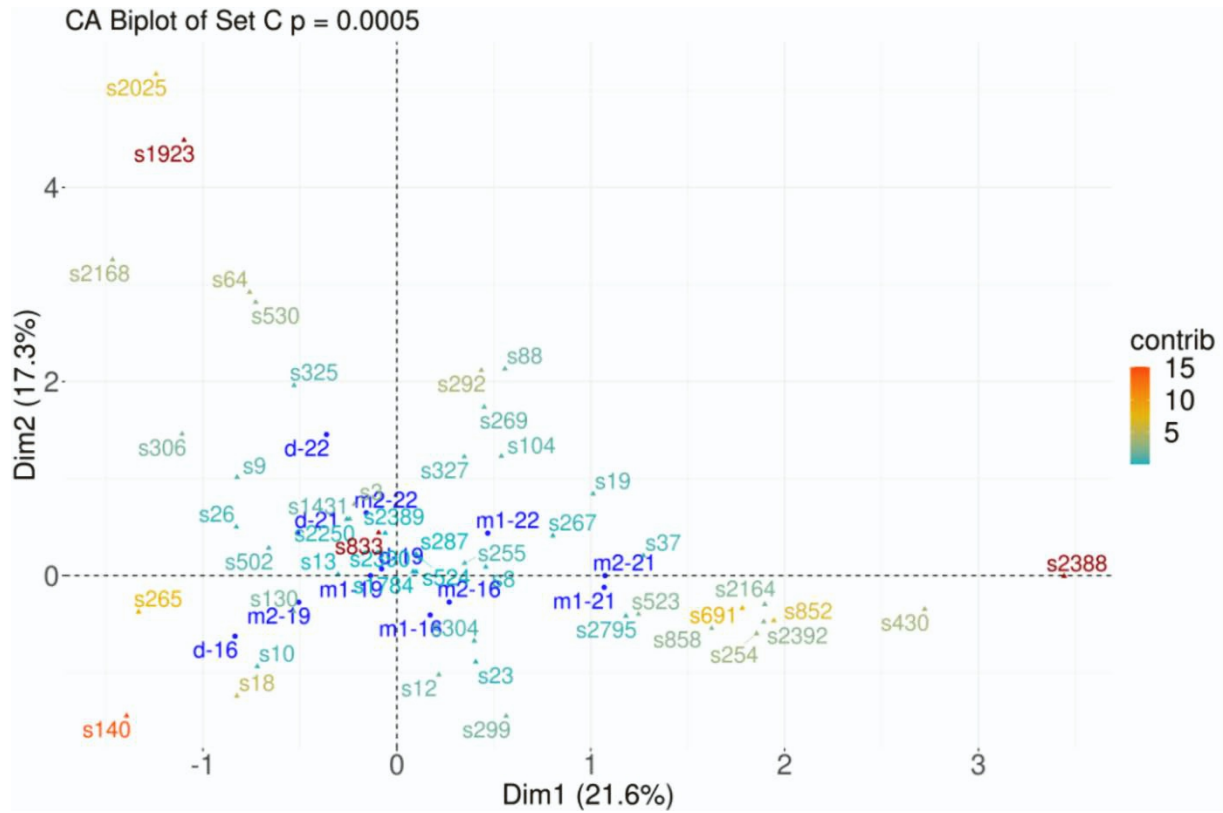

**Figure S3. MZs clustered in two out of the four time points analyzed.** Correspondence analysis on set C presenting clusterization of MZs at 16 and 21 months. Samples are in blue, and ASVs, denoted by s#, are colored by contribution to the coordinates. ASVs in color wine are outliers. m1 = monozygotic twin 1; m2 = monozygotic twin 2; and d = dizygotic twin. Related to Figure 4 and Figure S4.

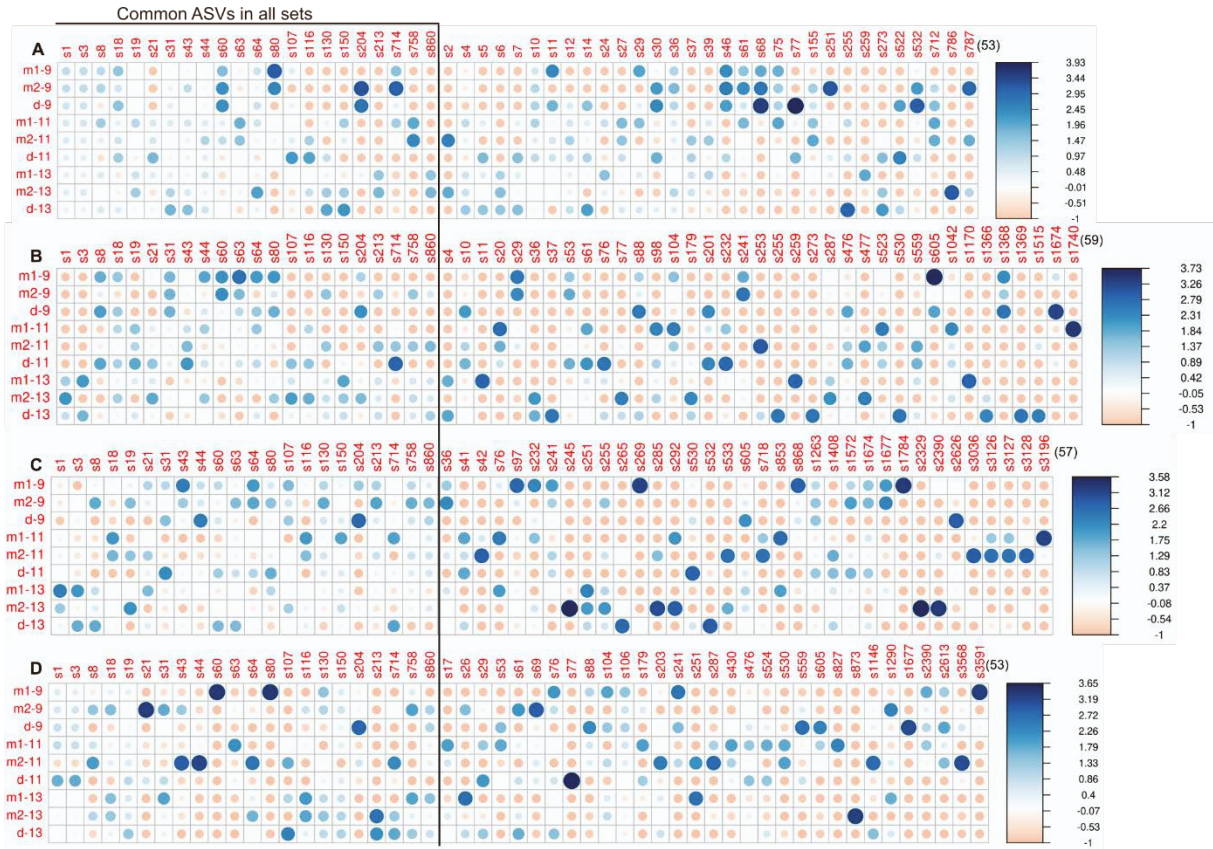

**Figure S4. Sample-ASV Associations.** Log<sub>2</sub> of the likelihood ratio (observed value/expected value) as index of association between samples and ASVs, here identified as s#. (A) set A; (B) set B; (C) set D; and (D) set E. m1 is the monozygotic twin 1, m2 is the monozygotic twin 2, and d is the dizygotic twin, at time points 9, 11, and 13 months. Associations are graded by colors. Blue color represents association of attraction, red color represents association of repulsion. Numbers next to the color gradient bar are the values of the log<sub>2</sub> of likelihood ratios. Values next to zero indicate no association, positive values indicate association of attraction, and negative values indicate association of repulsion. Numbers between parentheses next to the ASV IDs are the total number of ASVs. Related to Figure 4 and Figure S3.

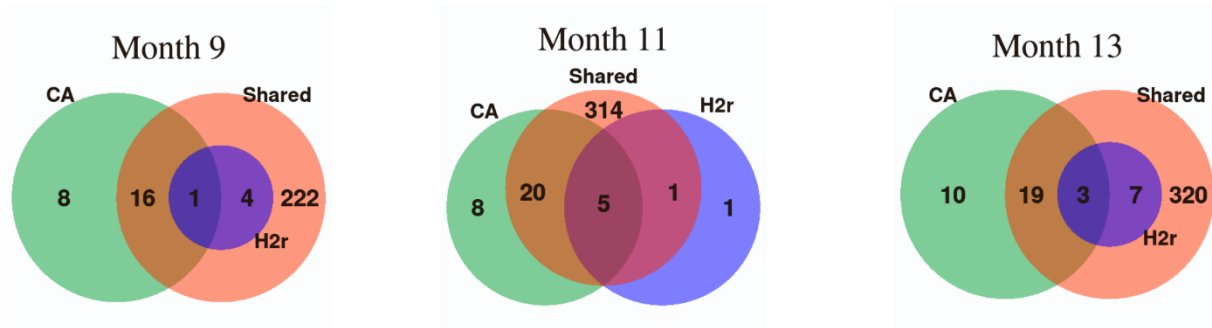

**Figure S5. Comparison of results obtained in three separate analyses.** (1) correspondence analysis where MZs were more similar, denoted by CA; (2) non exclusively shared ASVs between the MZs. denoted by the word 'shared'; and (3) heritability (H2r) per time point. 251, 349, and 359 ASVs were analyzed at time points 9, 11 and 13 months, respectively. Related to Figures 3, 4, 5 and Tables S5 and S6.

**Table S1. Clinical data of the study subjects. Related to STAR Methods.**

| Triplets set <sup>a</sup> | Infant-zygosity | Sex | In Vitro Fertilization (IVF) | Gestation (weeks) | Birth Weight (g) | Mode of feeding | Neonatal ICU Admission (days) | Antibiotic Use in ICU | Life Months with Antibiotic Use | Valid Sample Months (total # of samples) |
|---------------------------|-----------------|-----|------------------------------|-------------------|------------------|-----------------|-------------------------------|-----------------------|---------------------------------|------------------------------------------|
| A                         | MZ1             | F   | Yes                          | 33                | 1775             | Formula         | 21                            | No                    | None                            | 2,6,7,9,11,12,                           |
| A                         | MZ2             | F   | Yes                          | 33                | 2060             | Formula         | 21                            | No                    | None                            | 13,36                                    |
| A                         | DZ              | M   | Yes                          | 33                | 2200             | Formula         | 20                            | No                    | 37                              | (24)                                     |
| B                         | MZ1             | M   | Yes                          | 28                | 815              | EBM + Formula   | 89                            | Yes                   | None                            | 6,9,11,12,13,                            |
| B                         | MZ2             | M   | Yes                          | 28                | 750              | EBM + Formula   | 96                            | Yes                   | None                            | 14,18,20,21,22,                          |
| B                         | DZ              | F   | Yes                          | 28                | 1100             | EBM + Formula   | 80                            | Yes                   | None                            | (30)                                     |
| C                         | MZ1             | M   | Yes                          | 32                | 1870             | Formula         | 45                            | No                    | 20                              | 16,19,21,22<br>(12)                      |
| C                         | MZ2             | M   | Yes                          | 32                | 1710             | Formula         | 46                            | No                    | 20                              |                                          |
| C                         | DZ              | M   | Yes                          | 32                | 1915             | Formula         | 47                            | No                    | 20                              |                                          |
| D                         | MZ1             | M   | Yes                          | 30                | 1235             | EBM + Formula   | 81                            | Yes                   | 16                              | 9,11,13,18<br>(12)                       |
| D                         | MZ2             | M   | Yes                          | 30                | 1430             | EBM + Formula   | 70                            | Yes                   | 16                              |                                          |
| D                         | DZ              | F   | Yes                          | 30                | 1135             | EBM + Formula   | 70                            | Yes                   | 16                              |                                          |
| E                         | MZ1             | F   | No <sup>b</sup>              | 34                | 1895             | EBM + Formula   | 0                             | No                    | None                            | 1,2,6,7,9,11,13<br>(21)                  |
| E                         | MZ2             | F   | No <sup>b</sup>              | 34                | 1755             | EBM + Formula   | 0                             | No                    | None                            |                                          |
| E                         | DZ              | M   | No <sup>b</sup>              | 34                | 2175             | EBM + Formula   | 0                             | No                    | 12                              |                                          |

<sup>a</sup> All triplets were born from C-section

<sup>b</sup> Use of ovulatory stimulant

EBM = Expressed Breast Milk; MZ1 = Monozygotic 1; MZ2 = Monozygotic 2; DZ = Dizygotic; g = grams; ICU = intensive care unit; # = number

**Table S2. Description of processing of 16S sequences from fecal samples in each triplet set. Related to STAR Methods.**

| <b>Triplet sets</b> | <b>Num. of samples</b> | <b>Total num. raw reads</b> | <b>Num. of ASVs</b> | <b>Total num. of processed reads</b> | <b>Mean reads per sample</b> | <b>Mean reads per ASVs</b> | <b>Highest num. reads in a sample</b> | <b>Lowest num. reads in a sample</b> |
|---------------------|------------------------|-----------------------------|---------------------|--------------------------------------|------------------------------|----------------------------|---------------------------------------|--------------------------------------|
| <b>A</b>            | 27                     | 3.982.550                   | 1.364               | 1.251.106                            | 46.337                       | 917                        | 140.443                               | 13.109                               |
| <b>B</b>            | 30                     | 5.813.571                   | 1.343               | 1.758.163                            | 58.605                       | 1.309                      | 93.279                                | 21.489                               |
| <b>C</b>            | 15                     | 3.713.794                   | 1.178               | 964.244                              | 64.283                       | 819                        | 114.698                               | 46.084                               |
| <b>D</b>            | 15                     | 3.442.790                   | 992                 | 1.012.249                            | 67.483                       | 1.020                      | 130.203                               | 44.995                               |
| <b>E</b>            | 24                     | 5.149.164                   | 1.285               | 1.686.289                            | 70.262                       | 1.312                      | 137.098                               | 36.550                               |
| <b>Total</b>        | 111 <sup>a</sup>       | 22.101.869                  | 4.168               | 6.672.051                            | NA                           | NA                         | NA                                    | NA                                   |
| <b>Mean</b>         | 22                     | 4.420.374                   | 1.232               | 1.334.410                            | 61.394                       | 1.075                      | 123.144                               | 32.445                               |

<sup>a</sup>Twelve samples were removed from further analyses due to antibiotics intake

Num. = Number



**Table S3. Summary of ASV classifications and absolute abundance. Related to STAR Methods.**

| <b>Sets</b>                      |        | <b>Most abundant</b> | <b>Absolute abundance</b> | <b>Number of ASVs</b> | <b>Least abundant</b>         | <b>Absolute abundance</b> | <b>Number of ASVs</b> |
|----------------------------------|--------|----------------------|---------------------------|-----------------------|-------------------------------|---------------------------|-----------------------|
| <b>A</b>                         | Phylum | Bacteroidetes        | 457.776                   | 181                   | Fusobacteria                  | 19                        | 3                     |
|                                  | Genus  | Bacteroides          | 343.631                   | 98                    | Hydrogenoanaerobacterium      | 4                         | 2                     |
| <b>B</b>                         | Phylum | Bacteroides          | 571.144                   | 139                   | Enhydrobacter                 | 4                         | 1                     |
|                                  | Genus  | Firmicutes           | 614.935                   | 703                   | Verrucomicrobia               | 133                       | 2                     |
| <b>C</b>                         | Phylum | Bacteroides          | 288.147                   | 149                   | Clostridium_XI                | 4                         | 1                     |
|                                  | Genus  | Firmicutes           | 378.444                   | 637                   | Fusobacteria                  | 109                       | 9                     |
| <b>D</b>                         | Phylum | Escherichia/Shigella | 190.566                   | 32                    | Novosphingobium               | 4                         | 1                     |
|                                  | Genus  | Proteobacteria       | 287.662                   | 211                   | Fusobacteria                  | 4                         | 1                     |
| <b>E</b>                         | Phylum | Bacteroides          | 457.626                   | 107                   | unclassified_Oxalobacteraceae | 4                         | 1                     |
|                                  | Genus  | Firmicutes           | 557.435                   | 693                   | Planctomycetes                | 12                        | 1                     |
| Total number of ASVs in all sets |        |                      | 4,168                     |                       |                               |                           |                       |
| Total number of distinct Phyla   |        |                      | 13                        |                       |                               |                           |                       |

**Table S5. Taxa whose ASVs are shared only between the MZs throughout the sets.  
Related to Figure 3.**

| Taxa(Phylum_Genus)                             | Amount of ASVs in each set |    |    |    |    | Total |
|------------------------------------------------|----------------------------|----|----|----|----|-------|
|                                                | A                          | B  | C  | D  | E  |       |
| Actinobacteria_Bifidobacterium                 | 10                         | 6  | 2  | 29 | 13 | 60    |
| Bacteroidetes_Bacteroides                      | 6                          | 17 | 14 | 7  | 8  | 52    |
| Firmicutes_Veillonella                         | 10                         | 18 | 5  | 8  | 9  | 50    |
| Proteobacteria_unclassified_Enterobacteriaceae | 5                          | 4  | 9  | 10 | 16 | 44    |
| Firmicutes_unclassified_Lachnospiraceae        | 15                         | 14 | 4  | 5  | 4  | 42    |
| Bacteroidetes_Prevotella                       | 1                          | 2  | 36 | 0  | 1  | 40    |
| Firmicutes_unclassified_Ruminococcaceae        | 13                         | 3  | 11 | 2  | 7  | 36    |
| Firmicutes_Faecalibacterium                    | 22                         | 1  | 7  | 6  | 0  | 36    |
| Proteobacteria_Haemophilus                     | 6                          | 17 | 5  | 0  | 2  | 30    |
| Firmicutes_Clostridium_sensu_stricto           | 2                          | 6  | 12 | 3  | 6  | 29    |
| Firmicutes_Clostridium_XIVa                    | 6                          | 5  | 3  | 2  | 3  | 19    |
| Firmicutes_Streptococcus                       | 1                          | 4  | 3  | 2  | 7  | 17    |
| Proteobacteria_Klebsiella                      | 2                          | 12 | 2  | 1  | 0  | 17    |
| Firmicutes_Blautia                             | 4                          | 1  | 3  | 3  | 4  | 15    |
| Firmicutes_unclassified_Peptostreptococcaceae  | 3                          | 4  | 0  | 1  | 7  | 15    |
| Firmicutes_Dialister                           | 0                          | 0  | 13 | 0  | 0  | 13    |
| Firmicutes_unclassified_Clostridiales          | 4                          | 1  | 5  | 2  | 0  | 12    |
| Actinobacteria_Actinomyces                     | 2                          | 1  | 0  | 4  | 4  | 11    |
| Verrucomicrobia_Akkermansia                    | 3                          | 0  | 1  | 2  | 5  | 11    |
| Firmicutes_Clostridium_IV                      | 4                          | 4  | 0  | 1  | 1  | 10    |
| Firmicutes_Clostridium_XVIII                   | 0                          | 2  | 2  | 2  | 4  | 10    |
| Proteobacteria_Escherichia/Shigella            | 3                          | 1  | 1  | 2  | 2  | 9     |
| Firmicutes_Ruminococcus2                       | 4                          | 1  | 3  | 0  | 1  | 9     |
| Firmicutes_unclassified_Clostridiaceae_1       | 0                          | 7  | 1  | 0  | 1  | 9     |
| Firmicutes_Flavonifractor                      | 3                          | 2  | 1  | 2  | 0  | 8     |
| Firmicutes_Roseburia                           | 2                          | 2  | 0  | 2  | 2  | 8     |
| Firmicutes_Erysipelotrichaceae_incertae_sedis  | 2                          | 0  | 1  | 3  | 2  | 8     |
| Firmicutes_Lachnospiraceae_incertae_sedis      | 6                          | 1  | 0  | 0  | 0  | 7     |
| Firmicutes_Gemmiger                            | 1                          | 1  | 1  | 2  | 1  | 6     |
| Actinobacteria_Eggerthella                     | 0                          | 0  | 2  | 1  | 3  | 6     |
| Firmicutes_Enterococcus                        | 1                          | 1  | 0  | 3  | 1  | 6     |
| unclassified_Bacteria_unclassified_Bacteria    | 5                          | 1  | 0  | 0  | 0  | 6     |
| Firmicutes_Clostridium_XI                      | 1                          | 2  | 0  | 1  | 2  | 6     |
| Firmicutes_Oscillibacter                       | 2                          | 0  | 0  | 2  | 2  | 6     |
| Firmicutes_Ruminococcus                        | 1                          | 0  | 0  | 1  | 4  | 6     |
| Bacteroidetes_Dysgonomonas                     | 5                          | 0  | 0  | 0  | 1  | 6     |
| Firmicutes_Butyricoccus                        | 1                          | 0  | 4  | 0  | 0  | 5     |
| Fusobacteria_Fusobacterium                     | 0                          | 1  | 1  | 0  | 2  | 4     |
| Firmicutes_Granulicatella                      | 1                          | 1  | 0  | 1  | 1  | 4     |

|                                                |   |   |   |   |   |   |
|------------------------------------------------|---|---|---|---|---|---|
| Actinobacteria_unclassified_Bifidobacteriaceae | 2 | 0 | 0 | 0 | 2 | 4 |
| Bacteroidetes_Parabacteroides                  | 1 | 1 | 0 | 0 | 2 | 4 |
| Firmicutes_Abiotrophia                         | 0 | 1 | 2 | 0 | 1 | 4 |
| Candidatus_Saccharibacteria_                   | 0 | 0 | 1 | 0 | 3 | 4 |
| Firmicutes_Anaerostipes                        | 2 | 0 | 1 | 1 | 0 | 4 |
| Bacteroidetes_Alistipes                        | 2 | 0 | 1 | 1 | 0 | 4 |
| Actinobacteria_Collinsella                     | 0 | 0 | 0 | 0 | 4 | 4 |
| Firmicutes_Lactobacillus                       | 2 | 0 | 0 | 0 | 2 | 4 |
| Proteobacteria_Proteus                         | 1 | 0 | 0 | 2 | 0 | 3 |
| Actinobacteria_Olsenella                       | 3 | 0 | 0 | 0 | 0 | 3 |
| Firmicutes_Megasphaera                         | 1 | 0 | 0 | 1 | 1 | 3 |
| Cyanobacteria/Chloroplast_Streptophyta         | 0 | 2 | 0 | 1 | 0 | 3 |
| Actinobacteria_unclassified_Actinomycetales    | 1 | 1 | 0 | 0 | 1 | 3 |
| Proteobacteria_Providencia                     | 0 | 0 | 0 | 3 | 0 | 3 |
| Firmicutes_unclassified_Peptoniphilaceae       | 0 | 0 | 0 | 0 | 3 | 3 |
| Firmicutes_Turicibacter                        | 0 | 1 | 0 | 0 | 1 | 2 |
| Firmicutes_Lachnospira                         | 0 | 2 | 0 | 0 | 0 | 2 |
| Firmicutes_Phascalactobacterium                | 0 | 1 | 0 | 1 | 0 | 2 |
| Firmicutes_unclassified_Clostridia             | 1 | 1 | 0 | 0 | 0 | 2 |
| Firmicutes_Romboutsia                          | 0 | 1 | 1 | 0 | 0 | 2 |
| Proteobacteria_Neisseria                       | 0 | 1 | 1 | 0 | 0 | 2 |
| Proteobacteria_Mesorhizobium                   | 0 | 0 | 2 | 0 | 0 | 2 |
| Proteobacteria_Cupriavidus                     | 0 | 0 | 2 | 0 | 0 | 2 |
| Proteobacteria_Rhizobium                       | 0 | 0 | 1 | 1 | 0 | 2 |
| Bacteroidetes_unclassified_Bacteroidales       | 1 | 0 | 1 | 0 | 0 | 2 |
| Firmicutes_Gemella                             | 1 | 0 | 1 | 0 | 0 | 2 |
| Firmicutes_Anaerotruncus                       | 0 | 0 | 0 | 2 | 0 | 2 |
| Proteobacteria_Acinetobacter                   | 0 | 0 | 0 | 1 | 1 | 2 |
| Actinobacteria_Corynebacterium                 | 0 | 0 | 0 | 1 | 1 | 2 |
| Firmicutes_Paenibacillus                       | 0 | 0 | 0 | 0 | 2 | 2 |
| Proteobacteria_Citrobacter                     | 2 | 0 | 0 | 0 | 0 | 2 |
| Firmicutes_Dorea                               | 0 | 0 | 0 | 0 | 1 | 1 |
| Actinobacteria_Propionibacterium               | 0 | 0 | 1 | 0 | 0 | 1 |
| Actinobacteria_Varibaculum                     | 0 | 0 | 0 | 0 | 1 | 1 |
| Firmicutes_Peptostreptococcus                  | 0 | 1 | 0 | 0 | 0 | 1 |
| Proteobacteria_unclassified_Pasteurellaceae    | 0 | 1 | 0 | 0 | 0 | 1 |
| Fusobacteria_Leptotrichia                      | 0 | 1 | 0 | 0 | 0 | 1 |
| Actinobacteria_Atopobium                       | 0 | 1 | 0 | 0 | 0 | 1 |
| Proteobacteria_unclassified_Neisseriaceae      | 0 | 1 | 0 | 0 | 0 | 1 |
| Proteobacteria_Caulobacter                     | 0 | 0 | 1 | 0 | 0 | 1 |
| Actinobacteria_Leifsonia                       | 0 | 0 | 1 | 0 | 0 | 1 |
| Bacteroidetes_Heliimonas                       | 0 | 0 | 1 | 0 | 0 | 1 |
| Proteobacteria_Cardiobacterium                 | 0 | 0 | 1 | 0 | 0 | 1 |

|                                          |            |            |            |            |            |            |
|------------------------------------------|------------|------------|------------|------------|------------|------------|
| Firmicutes_Oribacterium                  | 0          | 0          | 1          | 0          | 0          | 1          |
| Firmicutes_unclassified_Firmicutes       | 0          | 0          | 1          | 0          | 0          | 1          |
| Proteobacteria_Buttiauxella              | 0          | 0          | 0          | 1          | 0          | 1          |
| Proteobacteria_Delftia                   | 0          | 0          | 0          | 1          | 0          | 1          |
| Proteobacteria_Salmonella                | 0          | 0          | 0          | 1          | 0          | 1          |
| Firmicutes_unclassified_Lactobacillaceae | 0          | 0          | 0          | 1          | 0          | 1          |
| Firmicutes_Coprobacillus                 | 0          | 0          | 0          | 1          | 0          | 1          |
| Proteobacteria_Cronobacter               | 0          | 0          | 0          | 1          | 0          | 1          |
| Proteobacteria_Morganella                | 0          | 0          | 0          | 1          | 0          | 1          |
| Firmicutes_Staphylococcus                | 0          | 0          | 0          | 0          | 1          | 1          |
| Proteobacteria_Stenotrophomonas          | 0          | 0          | 0          | 0          | 1          | 1          |
| Proteobacteria_Bosea                     | 0          | 0          | 0          | 0          | 1          | 1          |
| Proteobacteria_Methylobacterium          | 0          | 0          | 0          | 0          | 1          | 1          |
| Proteobacteria_Sphingomonas              | 1          | 0          | 0          | 0          | 0          | 1          |
| Proteobacteria_Serratia                  | 1          | 0          | 0          | 0          | 0          | 1          |
| Bacteroidetes_Barnesiella                | 1          | 0          | 0          | 0          | 0          | 1          |
| Euryarchaeota_Methanobrevibacter         | 1          | 0          | 0          | 0          | 0          | 1          |
| Firmicutes_Intestinimonas                | 1          | 0          | 0          | 0          | 0          | 1          |
| <b>Total</b>                             | <b>182</b> | <b>160</b> | <b>173</b> | <b>132</b> | <b>156</b> | <b>803</b> |

**Table S6. Heritability (Hr2) test on ASV relative abundance by SOLAR-Eclipse. Related to Figure 5.**

| Time Points | ASVs    | Heritability (Hr2) | Taxa                                           | p-value | Sex covariate (beta values) | standard error of Hr2 estimate | N (families) <sup>a</sup> |
|-------------|---------|--------------------|------------------------------------------------|---------|-----------------------------|--------------------------------|---------------------------|
| 9           | ASV_1   | 0,81               | Bacteroidetes_Bacteroides                      | 0,0134  | 0,432                       | 0,167                          | 3                         |
|             | ASV_44  | 0,72               | Firmicutes_Clostridium_XVIII                   | 0,0133  | 0,301                       | 0,195                          | 4                         |
|             | ASV_714 | 0,72               | Proteobacteria_unclassified_Enterobacteriaceae | 0,0107  | 0,000                       | 0,189                          | 4                         |
|             | ASV_43  | 0,69               | Firmicutes_Erysipelotrichaceae_incertae_sedis  | 0,0243  | 0,023                       | 0,225                          | 4                         |
|             | ASV_63  | 0,60               | Firmicutes_Veillonella                         | 0,0357  | 0,004                       | 0,251                          | 4                         |
| 11          | ASV-31  | 0,90               | Firmicutes_Clostridium_XIVa                    | 0,0025  | 0,083                       | 0,082                          | 4                         |
|             | ASV-21  | 0,87               | Firmicutes_Clostridium_XIVa                    | 0,0048  | 0,051                       | 0,113                          | 4                         |
|             | ASV-80  | 0,82               | Firmicutes_Clostridium_sensu_stricto           | 0,0281  | 0,034                       | 0,181                          | 3                         |
|             | ASV-3   | 0,78               | Bacteroidetes_Bacteroides                      | 0,0060  | NE <sup>b</sup>             | 0,150                          | 4                         |
|             | ASV-60  | 0,73               | Firmicutes_Blautia                             | 0,0320  | 0,400                       | 0,217                          | 3                         |
|             | ASV-63  | 0,68               | Firmicutes_Veillonella                         | 0,0209  | 0,107                       | 0,208                          | 4                         |
|             | ASV-1   | 0,57               | Bacteroidetes_Bacteroides                      | 0,0476  | 0,040                       | 0,251                          | 4                         |
| 13          | ASV-1   | 0,90               | Bacteroidetes_Bacteroides                      | 0,0007  | 0,003                       | 0,079                          | 4                         |
|             | ASV-130 | 0,86               | Bacteroidetes_Bacteroides                      | 0,0073  | 0,000                       | 0,115                          | 4                         |
|             | ASV-860 | 0,86               | Bacteroidetes_Bacteroides                      | 0,0265  | 0,003                       | 0,133                          | 4                         |
|             | ASV-213 | 0,79               | Bacteroidetes_Bacteroides                      | 0,0201  | NE <sup>b</sup>             | 0,182                          | 3                         |
|             | ASV-18  | 0,77               | Proteobacteria_Escherichia/Shigella            | 0,0053  | 0,018                       | 0,156                          | 4                         |
|             | ASV-150 | 0,76               | Bacteroidetes_Bacteroides                      | 0,0049  | 0,368                       | 0,158                          | 4                         |
|             | ASV-116 | 0,74               | Proteobacteria_Escherichia/Shigella            | 0,0120  | 0,025                       | 0,180                          | 4                         |
|             | ASV-36  | 0,73               | Actinobacteria_Bifidobacterium                 | 0,0184  | 0,001                       | 0,206                          | 4                         |
|             | ASV-64  | 0,63               | Firmicutes_unclassified_Peptostreptococcaceae  | 0,0200  | 0,147                       | 0,215                          | 4                         |
|             | ASV-8   | 0,58               | Firmicutes_Veillonella                         | 0,0466  | 0,014                       | 0,268                          | 4                         |

<sup>a</sup>Number of sets analyzed

<sup>b</sup>NE: not estimated due to instability
